# Supplementary material for: CRISPR/Cas9-mediated knockout of factors in non-homologous end joining pathway enhances gene targeting in silkworm cells
Source: Springer Nature journal article supplement (doi:10.1038/srep18103), 2015-12-10
Supplement: 41598_2015_BFsrep18103_MOESM1_ESM.pdf [file 41598_2015_BFsrep18103_MOESM1_ESM.pdf]

## Supplementary information

### **CRISPR/Cas9-mediated knockout of factors in non-homologous end joining pathway enhances gene targeting in silkworm cells**

Li Zhu, Hiroaki Mon, Jian Xu, Jae Man Lee, Takahiro Kusakabe\*

*Laboratory of Insect Genome Science, Kyushu University Graduate School of Bioresource and Bioenvironmental Sciences, Hakozaki 6-10-1, Fukuoka 812-8581, Japan*

\* Correspondence author: T. Kusakabe  
Tel./fax: +81-92-642-2842.  
E-mail: [kusakabe@agr.kyushu-u.ac.jp](mailto:kusakabe@agr.kyushu-u.ac.jp)

Contents:  
Supplementary Figure S1-8  
Supplementary Table S1-5



## Supplementary Figure S2

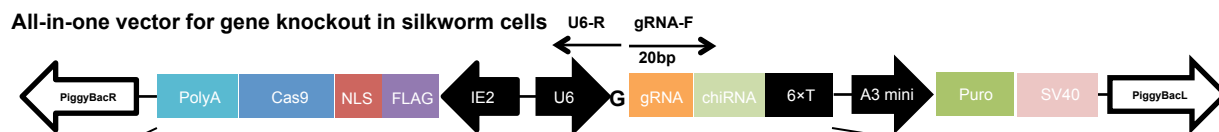

```

CACGCCGCTTGAAGAGGAGTGTGTAATGGCAATGTTGTACAAATAAAGTTGAAATATTTTATAAAATTTATTAACAAATATTAAACATAACATATTGTATTAACACATGACAATAACAAATGAAGTTAGTCAGATAAACTCAATGGTGATGGTGATGA
TGACCGGTACCGGTAGAATCGAGACCGAGGAGAGGGTATGGGATAGGCTTACCTCGAACCCGGGGCCCTAGCTTACCTGCAAGCAAGCTTTGTACAAGAAAGCTGGGTCTAGATATCTCGAcTAATGCAACCGAAACACGCATACAGCAGCGTA
CGGTGCTGCATCAGTTTGTGAGTTTGAATAATACCAGAGTCATGAAGAAGTCATCTCGAGCGTTGTCATCGTCATCCTTGATTAATACACCCTGCTGTGTGATGTCATGATTTATAATACACCCTGCTGTGTGATGTCATGTCATGTCATGTCGTC
ATCCGTCACCCCAAGCTGTGACAAATCTATCCGAGTTTCATATAATCCCGTGTAGGATTGGTGAATCAGTGTGCGCTCAGCACCTCCTGTGTAAGGTGTATGCTTGGCAGTCATCGTGTGCAAAATCTGTAAGCGGCTGGAGCGCGAGGT
GGTAAGAGTAACAAATGATAATATTTCCGCTGCTCAGTATGGTATCCCTGTGCTTTGTATGCGCTTAATCACTTTGTCAGATTGGCATCAGCTGGATGACTCTCTTACTGAATCGAAATTCGCTATGATTGCTCGAGATAATGTT
TGTGCTGCTCAACAAAAGTTGCTTCGTTGATCTTCAGGTGAACCTTCAACTTCGTAATGGGAGCCATAATACAGAAATTCACGATTTAGACGGTAGTGGAGTTCGCCCTTTGAAAGCTCCGCGGTAGCGAACATCCGTTTC
GCCGATTTCTAACTCAACACAGACTACTTGGTATGTTAATATGAGATCCCTTTTACTTCCCTGTAACTTCGCCCTCAAGGAAGTCGATGGGTTCTTTCAAAAGCAGACGCGCTCAATATGTTATCCCAATATGTTTGAATCGATTCAGTT
TGTTGGATTTTCCCTCTCAACTTTTCCCACTACTAGGACAGAAATAGGCACTGTAGGGCTATCGAGCCACCCTACTTTTTCGGGTCCCAAGCTCTTTTACGAGCGATGAGCTATACATCTTCTTTTGGAAAGATCGATCTTGAACCCCTCC
GGCTGCACTCAGTTTCTTACTATGTGACTTGGGGCATGGACAAAATTTCTCACCGTCCGCAAGTCCGGCCCTTATCCATACGATTTACCTGTCCTCCCAATGGTTCATTAAGGCTGGTTGGGATCTCCGTTTCCGAGAGTATGTT
TCCGCTTAAAGAAATCAATGTAGATAAAGAAAGTATGGTGTAGCCTGCTCCTGTGCTTTTCCGGATCATCTACGGAGCTATAAACCTTGTATACCCATACACAACTCACTTCTAGCTCCGGTATTTCTAATGAGTGGG
GTCCCTACAGCCGATTAAGATAAGCTCGTGGCAGTTGGTATTTATCTCCCTAACCTTATAGAAATCGCTTCTGAAAGTCGGACACCAATTTGACCTTAAAGGTGATTACTTTGACTTCCCGATCCAGCTTATCGCTGCTATTTC
GTATTCATTGGGAATCAGTACTGTGCAACATCTTTGTGATTGGCGGGTTCCACAGAGCTGAGCTTTAATAAATCCGGCCCTGTCAAGTTCAGACAAGCACCCTCTCAGCTTAAGTAAAGTAACTGCAATCTTTCGCTTATCGATTCGCTATTTC
TAGGAGCTGCCGCCAATAGTTCTTCAATTTCTTAGGACTTCCGCTTGGAACTTGTCACTTTTCCCTCGGTTCTTACCGAGCGTAAAGCACTTATTGTGATTAAGTAACTGGGTGCAATGGATCGACTTCAAAAAGGATGGGTCACATGGATCG
ATAACGGTTTATGTCAGTCTCCTGATCAACATCATGCTCCCTCATTGTAGGTAAATAGAGTAAAGTTCTCGTTCGAAATGGGTATTTCCACAGGATGCTCTTAAAGTCTGGCTGCCAGTTCTTAATACCTCTTACTTCTCTATCCG
CTCTCGACTGTTTTTTGCCCTCTGAGTCTGTTTATTTCCGCTGCCATCGATTAACAATGTTTTCCGGTTGTGACGCTCCATGACCTTAACTAGCTCCTCACTACTTTGACTGTCTGGAGTATGCCCTTTTGTATGGCTGGCAACCGAAGAT
TCCGAATATGTCGTGCAATGAGTCCCTGTCCGGAACCTGTGCCTTTTGTATATCCTCTTGAAGGTAAAGAGTCACTGGATGAGCTGCATAAAGTCCATTGGCGAAGCCGCTGCTCTTGAAGAAATCGAAGATAGTTTTACCCTTTGCTT
GTCTCTTACCGGTTGATAAGTTCCGCGACAATCGTCCAGCGCGATAGCGACGCTCTTAACTGTTTATAAAGTTCATCGTCAAGAGGTTGAGCGTATGTTTTAGTCTTCCCTCAATCATTCCCGATCTCAAGAGGGTAAGAGTCAACACTA
TATCTTCAAGATATCTCATTCTCTGTTACAGAGGCTTATCTTAAATATCTTAGGAGGCTCATGATAGTACCAAGTACGACCTAAATCGATCTTACCCCGAGATCTCGACAGAAATCGAAGATTCATTTTCAAGTAGTCCCTTT
CAATTGCTAACTGTCACCTTGGGTTGGTCTGAATAACAGATCTACTATGCTTCTTCTGCTCCGCTTGAAGAGCGGGTTACGCGATGCCCTCAGTACATACTAACTTTCGAGGTTTCAATGACACTGTAAAGTAAAGTAAAGT
GCTTAGGCAATACTTTTTCTGTCGGTAAATCTTGTCAAAGTGGTCACTCCTCGATGAACGATTGAGCTGACGCACTTTATCGACAACCTCTCAAAATCCATGGAGTAATGTTCTTCCGACTTCTTGTATCCATCGCAACCGAAGTCCG
TCGGCCAGGGTCCCATAGTAAAGTATGCGAAAGTTAGGATTTTCAATCTTTTCCAGATGTCTTGGAGAAACGGATAAAATCTCCTGCTTCAATATAGCATGCAATTCGCTAAAGTGGATTTGATGGAATGCTACCTGTGCGAAA
GTCCGCTGCTTCCGAGTAGACTTTCGCGATTGAGTTTACAAGAACTTCCGCTCCATCCTCTTCTAATAGGGTTGATAAACTGTGAAATTCCTTGAATTCGCTCGCTCCGCGCTCAATACCTGCTACCCGTTTTCGACTGATCAAGAA
TATTTCCCTATATTCTCAGGCACTTCTGACGAGTTCGACGACTAGGGCTTGAAGAGTGTCAAGTCTGGGTATGTTCAAGTCTTTCGCTTGTGACAGTTCGCAAGGAAAGGACTTCCAAACGGTGAAGAAAGATCGTCAACTTTGGCCATCTCATTGCAAAA
CTAAGTTTGGCAGCCAAAATAAGTCCGCATGATCTCAATTTGTCCAGTAGATGTGCGAGATGTCGAGATGTCATCGTACGCTGCTTACTAAGCTGCAATTTGCAATCTCAGTAAAGTCAAGTCAACTTAAATTTGGTGTGAGCGCTAGTGAGA
GCGCTAAGGTTTCCGCAACACCCATTTTTCTCTCCGGTAAATGTTGCGACTGAGTGTCTTAGCCGCTGGGTTAGAGAGGCGGGCGCTAAGAAAGCTTCCGATCCAGCCACTTGCATTAATAGGGTCTCTTCAACAACTGATTAAGT
TTGACTAACTGGATGAACAGTTTGTGACATCCGAGTTGTCCGGATTAGATCACCTCAATGAGAAAGTCCCGCAAGTTCATATGAGGCAAGGCAAGTAACTCAGTCCGCTTTCAGTGTAGTCAACTAGCTTTTTTCTGAG
GTGATAAATCGTTGGGACTTTTCATGATGACACCTCATCTACTGTTTCCAAAGATGGGGTCCGCTCATGTTCTTGTGCTCTCGACAAGGAAAGGACTTCCAAACGGTGAAGAAAGATCGTCAACTTTGGCCATCTCATTGCAAAA
TCTTGTAAATAACTATCGGTTCTTCCGAGCTGTATACCCTTCCGAGCGGTTGTTCCAGGAGTCCGCTTCCGCTTCCGCACTCATGAAATAGGAGGGCACCAGATAAGATCTTTTTAATCGAATGCGGCTGTGTCCCAACAGCTTAAAT
CTTTGAAGGTACTTTGTATTCATCGTGTATGACAGCCCTCAACGGAAATGAGTCCGATGCTAAACCAATAGAACTTTTATCAACTCGGTACCGGATCCGGGATCTTACCTTACGTTCTTCTCGGCCCTCCAGAAATTCAGCTTTATCGG
TAAAGTATTCCTTAGAGAAATGGTTCTACTCCCTCGAAGCTGCTTTTGTACAACCTTGATACCGGTTGGTGTATGTCATCTTGAATGATCGTCAATGATGATCTTTATAATCACCGCTATGGCTTTGTAGTCCATGGTGGGAGCTCCGAATTC
CTGAGTGGTACCCTAGGTGTATACCTCGGAAGCGGCACTCGAGATTGCAACAACTCTCTAGACAGCCCTGATCTCGGTACCAAGCTTTAAATCGAAGACATGCTGTTCACTGTGTTACAGATGTTGCGGGCTGTATTTATAGGG
CGATAAGCGGACGGGCGCTCGTGTCCGTCACGCGCATGAGATAACGCGCGCTGATAGGAGCGCTCCTGTCCGATAAGGAGTGGCTCCGCTCGGTTAGCAACACAGGAAAGCTGGCGTCTGTACAGATAAGCAACACTCGTCC
GGTCCGATAATGTGATCTGACTGACAGGACCGCACCCGATAAGCGGGCTTACGCTGACTGCCACACGCTACTTTTGGACTGCAAAAAGGTTCAATGTGGTAGTGTATTGGAGCGTATACACCGGTGTAGACTATTATGAAAATAGCTAC
GAAAACGAAGTTGATCATGATGAGGCGCGGTGCAAAAAGCTGTTTTTTGCAGTGCAAAAGAGTGGTGGGGGGAGGACCAGGATGAAAGGTTGTTGGCAACATGAAAACACAGTTCAACAGAAATGTTGTTGAAGCAACATTAGC
ACCATACCTGTTTATCATCATGGGAGTGTATGATACACTTTGTTAAATCACTGAATGTTTTAGATGATTTAAACAAATAGTACTTTAATAATAAAGTACATACCTTGAGAATTTAAAATCGTCAACTATAAGCCATACGAAATTAAGCTTGGT
ACTGGCTATAGATAAGCAGATAAAGAAATGTTAACGTGTAAAGCAAGGTCAGATGATGATGTTTTGCAAGATAAAGATGAGCGCTGACAAAACCACTGTTTTCTATTGTTTTATGATTTATACAATTTAAAGTTTTATGTT
TATTTATTAATCGTTTAAATATATATATCTTAAAGAAATGTTAAAGTTTTGCTCTTTTGAATAACTTTGTAAGTCCAGTGTGTGTAATCACGCTTCAATAGTTAGTTTTTTAGGTATATACAAAATATCGTCTCACAAAGTGTGN
NNNNNNNNNNNNNNNNNNNNNNNNNNNNNNNNNNNNNNNNNNNNNNNNNNNNNNNNNNNNNNNNNNNNNNNNNNNNNNNNNNNNNNNNNNNNNNNNNNNNNNNNNNNNNNNNNNNNNNNNNNNNNNNNNNNNNNNNNNNNNNNNNNNNNNNNNNNNNN

```

**Supplementary Figure S2. Sequence of the All-In-One vector.** A cassette for Cas9 expression and a cassette for gRNA expression were inserted into the middle of *PiggyBac* arms. A cassette for puromycin expression was used for cell selection.

### Supplementary Figure S3

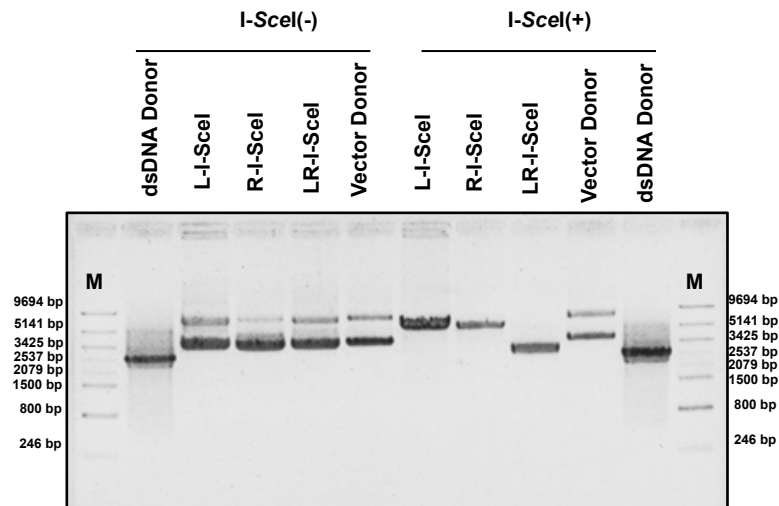

**Supplementary Figure S3. Gel image of plasmid DNAs and DNA fragments used for transfection in knockin experiments.** To confirm I-SceI sites were inserted in plasmid donors or not, constructed plasmids (L-I-SceI, R-I-SceI, LR-I-SceI, and Vector donor) were digested *in vitro* by I-SceI for 15 min at 37 °C, followed by gel electrophoresis. PCR products (dsDNA Donor) was used as a control for evaluation of DNA size.

## Supplementary Figure S4

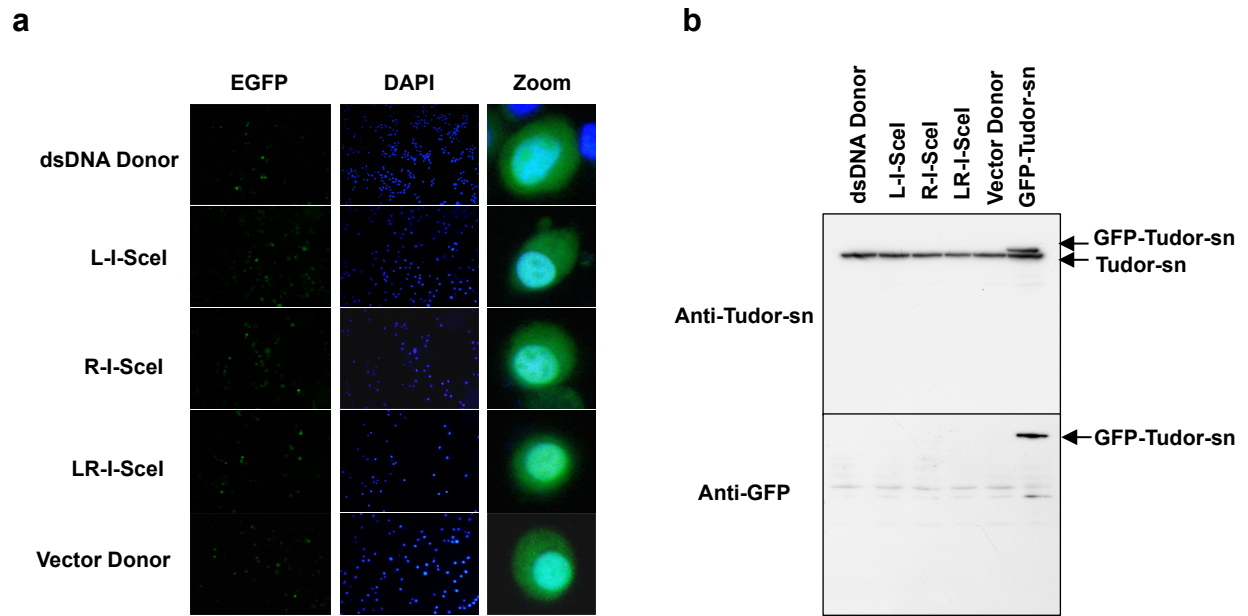

**Supplementary Figure S4. Expression of EGFP-fused BmTudor-sn.** (a) Knock-in positive cells were visualized by a fluorescent microscope. (b) Western blot was performed to detect the fusion protein.

# Supplementary Figure S5

**a**

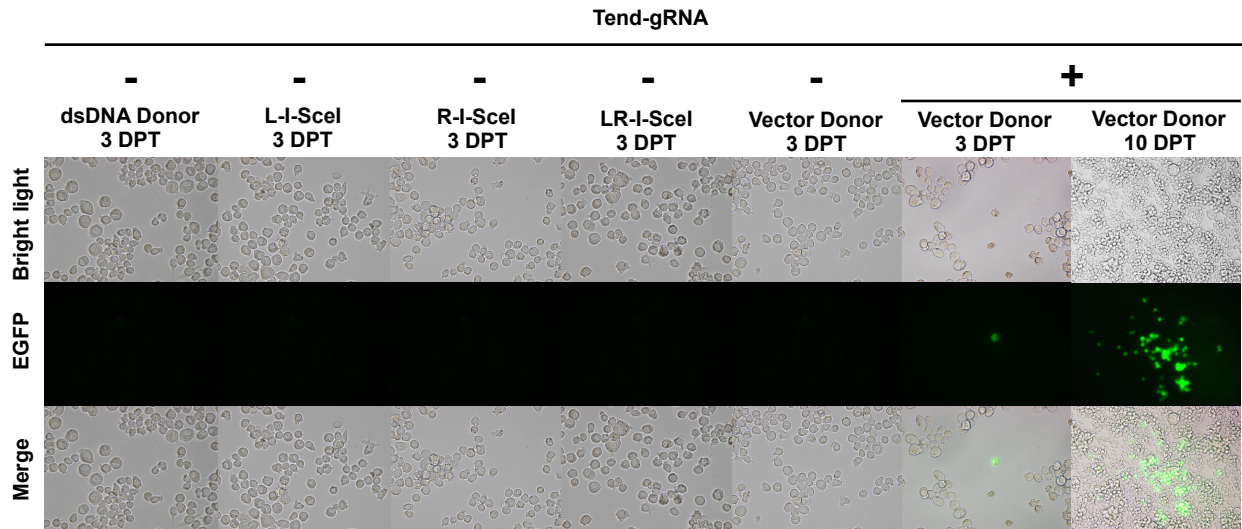

**b**

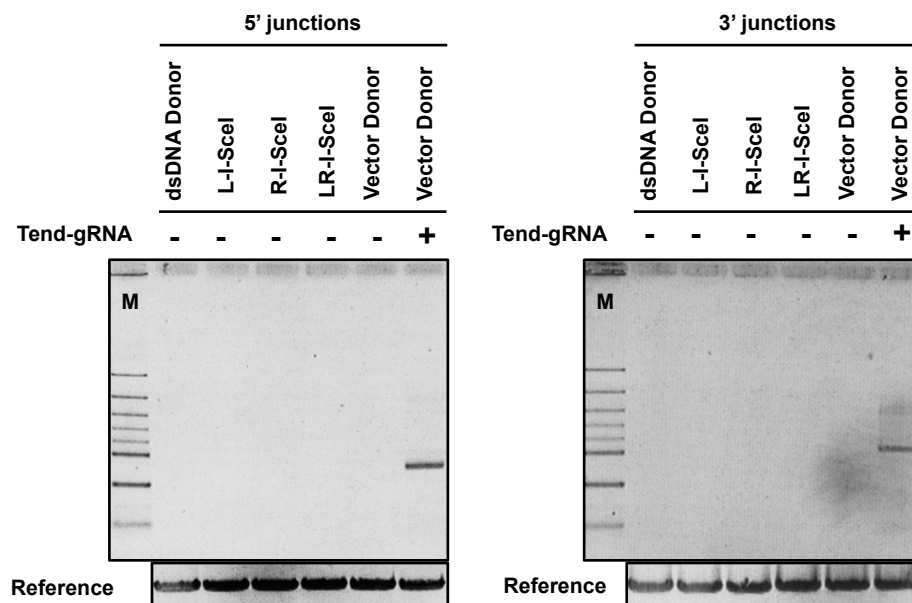

**Supplementary Figure S5. Random integration was not found in the cells transfected with only donors.** (a) Images of BmN4 cells transfected with pie2FW-Cas9, donors and Tend-gRNA expression vector (+), or without Tend-gRNA expression vector (-). There was no signal in the cell without Tend-gRNA transfection 3 days post transfection (DPT). (b) Genomic DNA PCR was performed from the cells transfected with pie2FW-Cas9, donors and Tend-gRNA expression vector (+), or without Tend-gRNA expression vector (-), after fluorescence microscope observation. 5' junction and 3' junction were not amplified in the genomes of the cells without transfection of gRNA expression vector.

# Supplementary Figure S6

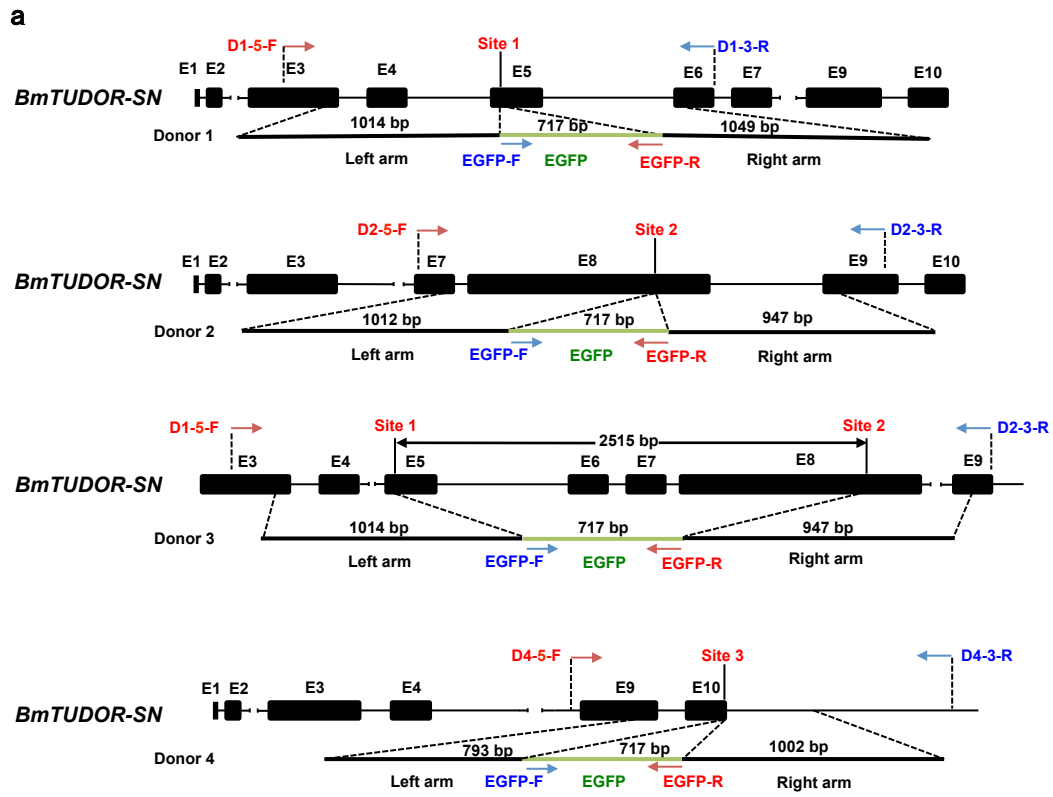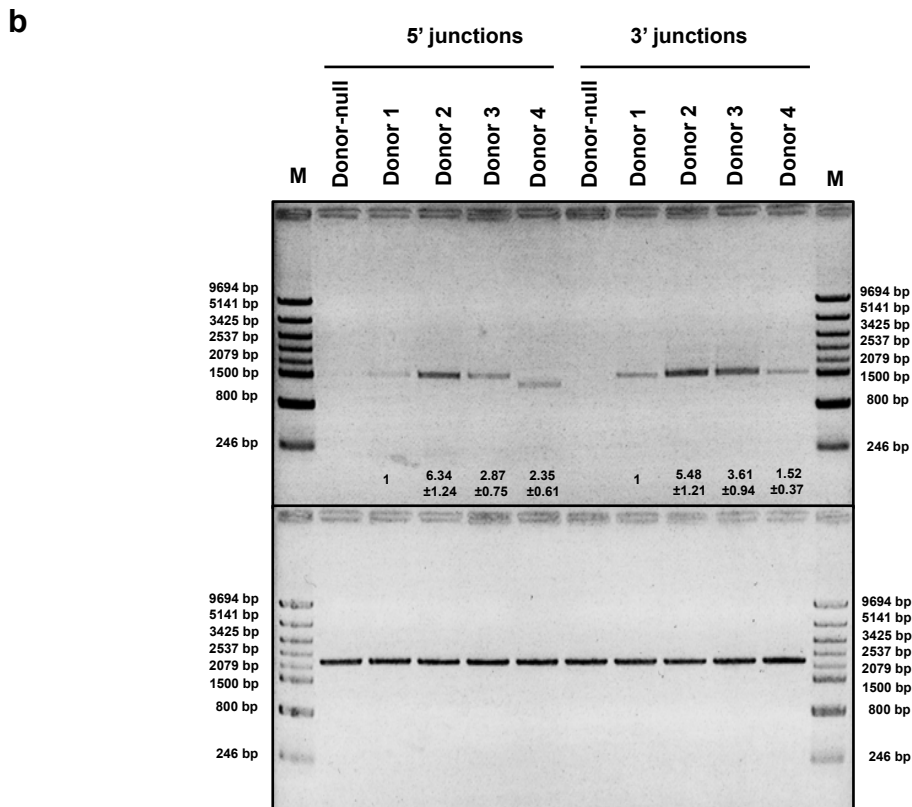



**Supplementary Figure S6. Knock-in of EGFP gene at three different sites of *BmTUDOR-SN* gene.** (a) Schematic illustration of knock-in strategies for targeting to the sites in *BmTUDOR-SN* gene with four kinds of DNA donors (plasmids). Exons were indicated by black boxes, and target for gRNA of *BmTUDOR-SN* gene are indicated by a short straight line. The primers for 5' junction and reference amplification were marked by red and black arrows, respectively. Primer sequences were listed in Table S5. (b) Genomic DNA PCR was performed at 7 days post transfection of the donors as indicated. The gel images were analyzed by Image J to quantify the PCR products, with normalization to the reference bands. The PCR product from BmN4-SID1-Cas9 cells transfected with donor 1 was set as 1 fold. The agarose gel images were representatives from repeated three independent experiments. The numbers below the PCR bands represent mean fold  $\pm$  S. D. from the three repeats.

# Supplementary Figure S7

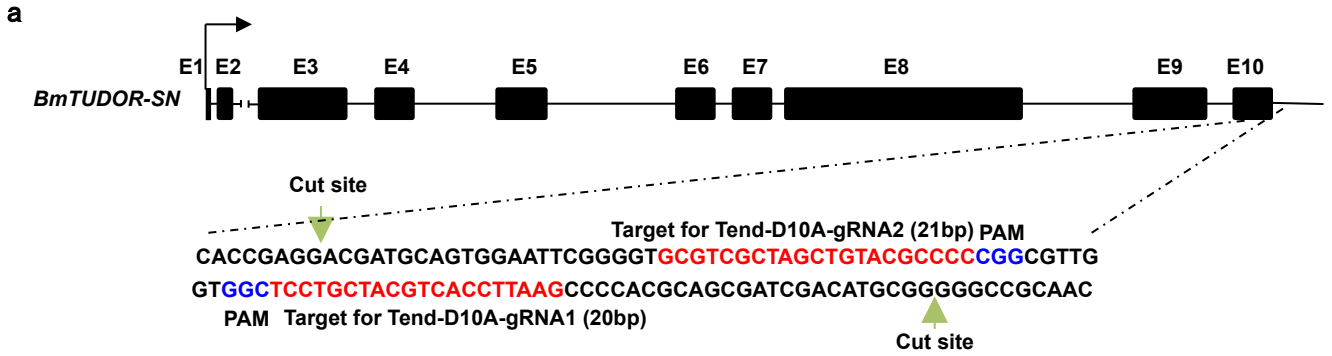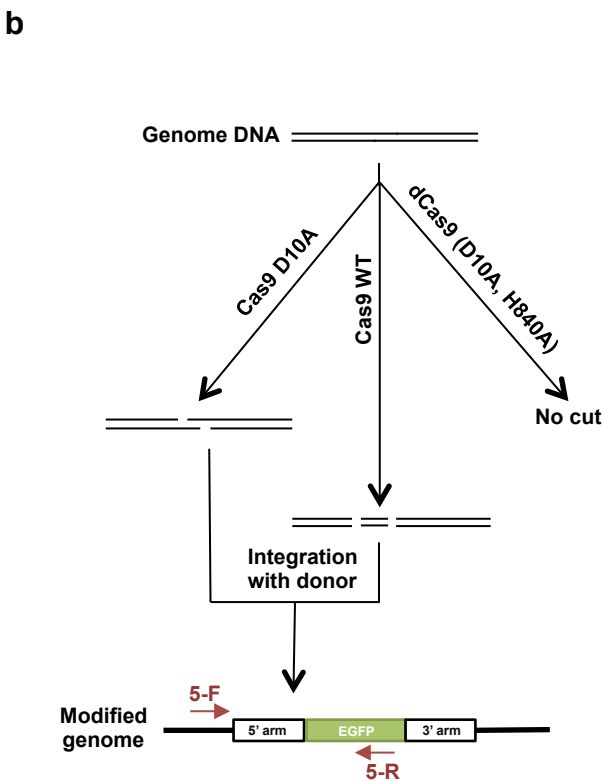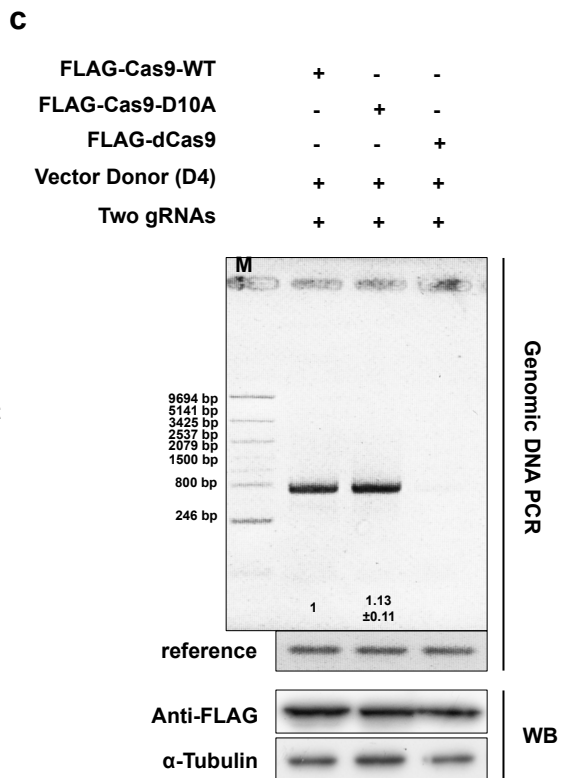

**Supplementary Figure S7. Comparison of knock-in efficiency between wild type of Cas9 and mutant Cas9 proteins** (a) Schematic illustration of knock-in strategies for targeting to the site 3 in *BmTUDOR-SN* gene with paired gRNAs and Donor 4 plasmid. The gRNA targeting sequence was marked by red, and PAM was marked by blue. The cut sites by Cas9 D10A were marked by green arrow heads. (b) Graphic representations of *BmTUDOR-SN* gene editing using different types Cas9 proteins. The primers for 5' junction amplification were marked by red. Primer sequences were listed in Table S5. (c) Genomic DNA PCR was performed at 7 days post transfection. The gel images were analyzed by Image J to quantify the PCR products, with normalization to the reference bands. The PCR product from BmN4 cells transfected with wild type Cas9 expression vector was set as 1 fold. The agarose gel images were representatives from repeated three independent experiments. The numbers below the PCR bands represent mean fold from the three repeats. Western blot was performed to detect Cas9 protein levels.  $\alpha$ -Tubulin was used for loading control.

## Supplementary Figure S8

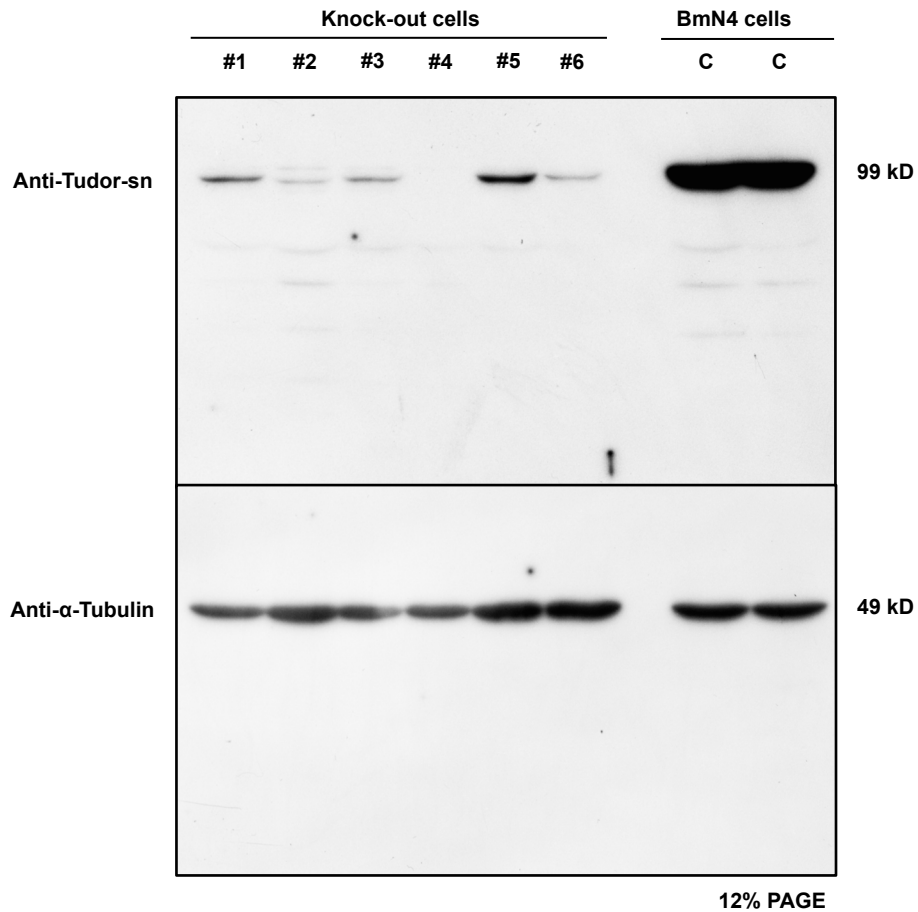

**Supplementary Figure S8. Western blot was performed to detect BmTudor-sn protein in knock-out cells and normal BmN4 cells.** The BmN4 cells were transfected with All-In-One vector targeting to the site 2 of *BmTUDOR-SN* gene, followed by limiting dilutions for isolation of mutant cells. After several times of limiting dilution, six cell lines were subjected to western blot. C is normal BmN4 cells served as the negative control.

Supp. Fig. 1d. Supplementary full length DNA gel.

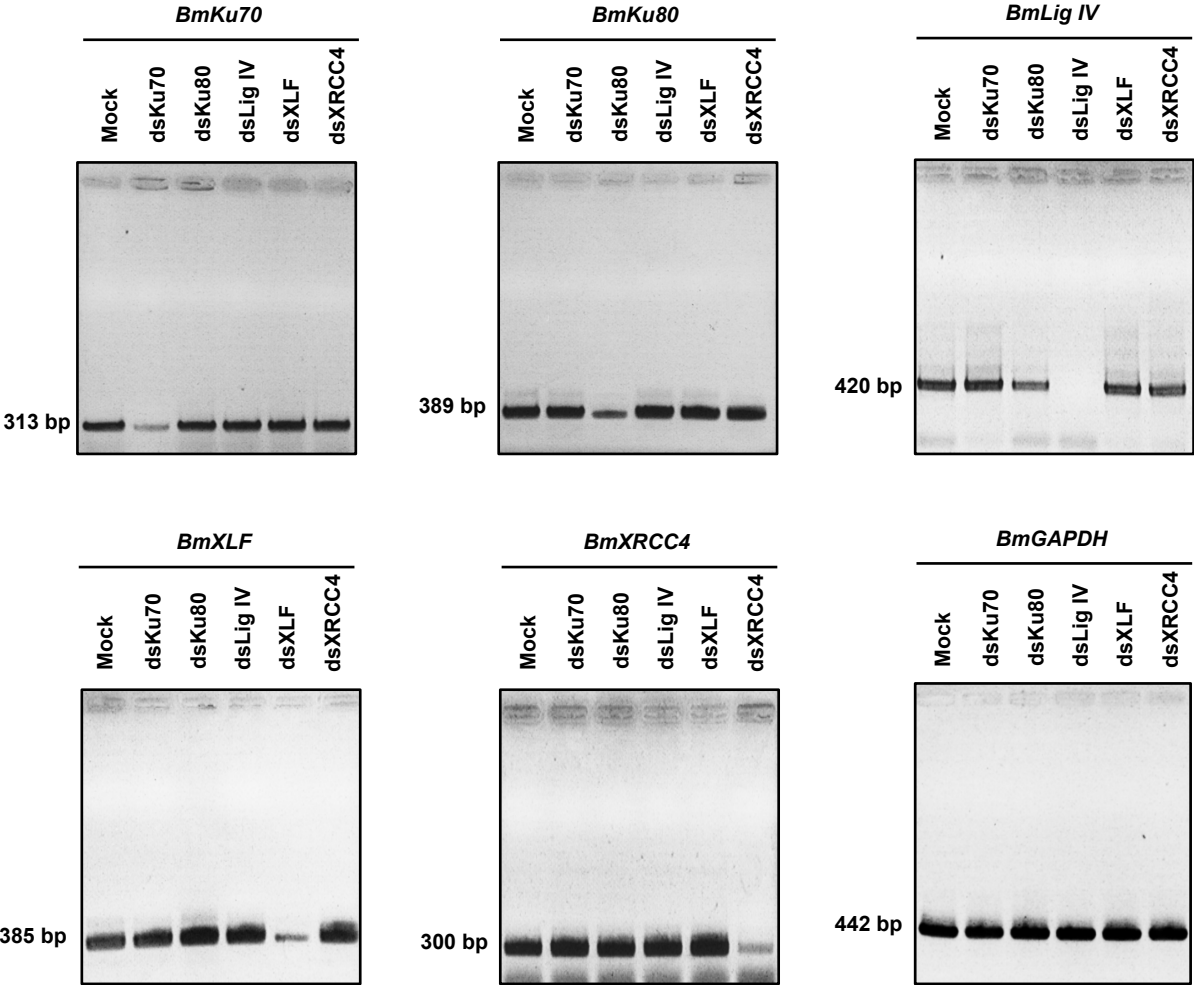

Supp. Fig. 2d. Supplementary full length western blot.

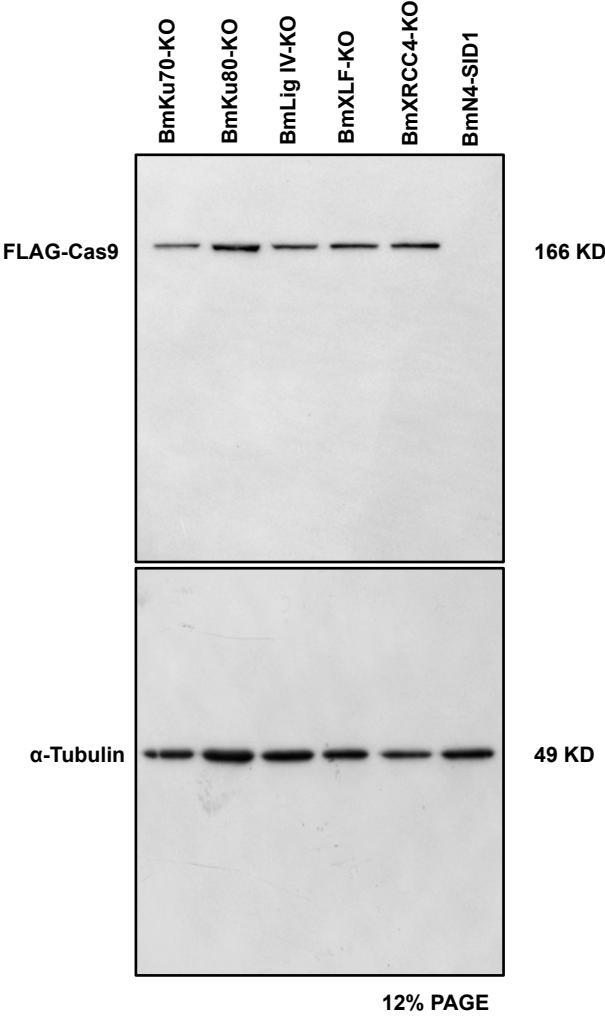

Supp. Fig. 2e. Supplementary full length DNA gel.

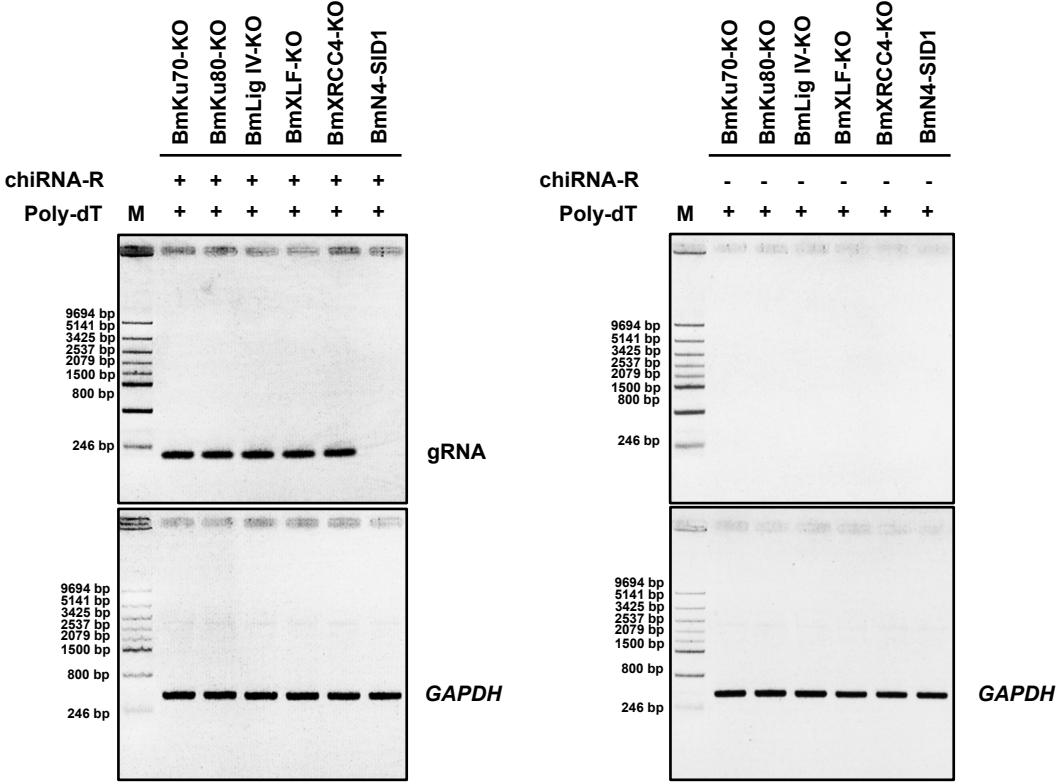

Supp. Fig. 4b and Fig. 4c. Supplementary full length western blot.

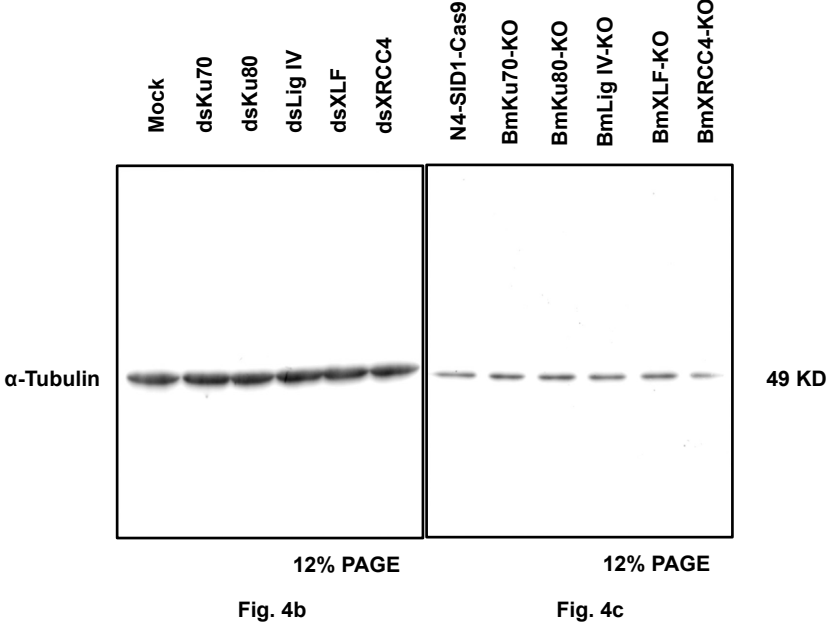



Supplementary Table S1: Primers used for vector construction

| Primer name             | Primer sequence (5'-3')                                | Use                         |
|-------------------------|--------------------------------------------------------|-----------------------------|
| Hcas9-withoutATG-F      | GATAAAAAGTATTCTATTGGTTTAGaCATCGGCA                     | cloning of Cas9 CDS         |
| Hcas9-NotI-R            | TTGCGGCCGCAATCATCCTGCAGCCTTGTCATCGTC                   |                             |
| Hcas9-R-D10A            | AGTGCCGATgcgTAAACCAATAGAACTTTTTATCCAT                  | Cas9 D10A mutation          |
| Hcas9-F-D10A            | AATTCCGTTGGATGGGCTGTCATAACCGATGAATACAAA                |                             |
| Hcas9-R-H840A           | TTGGGGTACAATggcATCGACGTCGTAATC                         | Cas9 H840A mutation         |
| Hcas9-F-H840A           | TCCTTTTTGAAGGACGATTCAATCGACAATAAAG                     |                             |
| BmU6-2 promoter-F       | AGGTTATGTAGTACACATTG                                   | cloning of U6 promoter      |
| BmU6-2 promoter-R       | CACTTGTAGAGCACGATATT                                   |                             |
| chiRNA-R-polyT          | AAAAAAgcaccgactcgggtgccacttttca                        | cloning of U6-gRNA cassette |
| NHEJ I-SceI mCherry atg | ACGCTAGGGATAACAGGGTAATCCACCATGGTGAGCAAGGGCGAGGAGGATAAC | NHEJ reporter construction  |
| NHEJ I-SceI IE2 polyA   | CTATATTACCCTGTTATCCCTAGCGTAACCGTATTACCGCCTTTGAGTGAGC   |                             |
| NHEJ I-SceI linker a    | AGCTTTACGCTAGGGATAACAGGGTAATATACC                      |                             |
| NHEJ I-SceI linker b    | AGCTGGTATATTACCCTGTTATCCCTAGCGTAA                      |                             |

Supplementary Table S2: Primers used for gRNA cloning into All-In-One or psk-U6-gRNA backbone

| Gene              | Primer name/gRNA/Target | Sequence (5' to 3')                           |                                                |
|-------------------|-------------------------|-----------------------------------------------|------------------------------------------------|
| <i>BmKU70</i>     | Ku70-gRNA-F             | GCTCAGCTTATTTTGAATgttttagagctagaaatagcaagtt   |                                                |
|                   | gRNA                    | GGCTCAGCTTATTTTGAAT                           |                                                |
|                   | Target                  | CGCTCAGCTTATTTTGAATTGG                        |                                                |
| <i>BmKU80</i>     | Ku80-gRNA-F             | AAATCAGATTCAAGAACGAAgttttagagctagaaatagcaagtt |                                                |
|                   | gRNA                    | GAAATCAGATTCAAGAACGAA                         |                                                |
|                   | Target                  | AAAATCAGATTCAAGAACGAAAGG                      |                                                |
| <i>BmLIG IV</i>   | Lig IV-gRNA-F           | CATGTGTAGCTATTTTATCAgttttagagctagaaatagcaagtt |                                                |
|                   | gRNA                    | GCATGTGTAGCTATTTTATCA                         |                                                |
|                   | Target                  | CCTTGATAAAATAGCTACACATGC                      |                                                |
| <i>BmXRCC4</i>    | XRCC4-gRNA-F            | AGAGTATACTGATGATTCTGgttttagagctagaaatagcaagtt |                                                |
|                   | gRNA                    | GAGAGTATACTGATGATTCTG                         |                                                |
|                   | Target                  | AAGAGTATACTGATGATTCTGAGG                      |                                                |
| <i>BmXLF</i>      | XLF-gRNA-F              | AATATTAAGTGTGATAATGgttttagagctagaaatagcaagtt  |                                                |
|                   | gRNA                    | GAATATTAAGTGTGATAATG                          |                                                |
|                   | Target                  | AAATATTAAGTGTGATAATGTGG                       |                                                |
| <i>BmTUDOR-SN</i> | Targeting to site 1     | SN2-gRNA-F                                    | GAAAGACGTCGAAGTAGTTCgttttagagctagaaatagcaagtt  |
|                   |                         | gRNA                                          | GGAAAGACGTCGAAGTAGTTC                          |
|                   |                         | Target                                        | AAGGACGATGCAGTGGAAATCTGG                       |
|                   | Targeting to site 2     | Tudor-gRNA-F                                  | GTTTTACAGCCGATGACCAAgttttagagctagaaatagcaagtt  |
|                   |                         | gRNA                                          | GGTTTTACAGCCGATGACCAA                          |
|                   |                         | Target                                        | CGTTTTACAGCCGATGACCAATGG                       |
|                   | Targeting to site 3     | Tend-gRNA-F                                   | AGGACGATGCAGTGGAAATTCgttttagagctagaaatagcaagtt |
|                   |                         | gRNA                                          | GAGGACGATGCAGTGGAAATTC                         |
|                   |                         | Target                                        | GAGGACGATGCAGTGGAAATTCGGG                      |
|                   | For double cut          | Tend-D10A-gRNA1                               | AATCCACTGCATCGTCCTgttttagagctagaaatagcaagtt    |
|                   |                         | gRNA                                          | GAATCCACTGCATCGTCCT                            |
|                   |                         | Target                                        | CCGAGGACGATGCAGTGGAAATTC                       |
| For double cut    | Tend-D10A-gRNA2         | CGTCGCTAGCTGTACGCCCCgttttagagctagaaatagcaagtt |                                                |
|                   | gRNA                    | GCGTCGCTAGCTGTACGCCCC                         |                                                |
|                   | Target                  | GCGTCGCTAGCTGTACGCCCCGG                       |                                                |

The lower case letters in the primers indicate the sequence in the backbone of All-In-One and psk-U6-gRNA plasmids. The red marked nucleotides indicate the perfect matched regions between gRNAs and targets in genome. PAMs were marked by blue.

Supplementary Table S3: Primers used for donor construction

| Donor name                 | Primer name            | Sequence (5' to 3')                     |
|----------------------------|------------------------|-----------------------------------------|
| Donor 1                    | S-HR-uparm-F           | ATTTGGAGTACTGATGCTGATGTATGTTACG         |
|                            | S-HR-uparm-R           | CTTTCTGCAGCAATCTGGACTCCAGGAAG           |
|                            | S-HR-downarm-F         | GACGTCGAAGTAGTTCTGGAGTCCGTT             |
|                            | S-HR-downarm-R         | GGCTTTCAATGTAGATGCACCTGTATTTTCAT        |
| Donor 2                    | T-HR-uparm-F           | GTCGTAAGCGGTGGCACGTAAG                  |
|                            | T-HR-uparm-R           | TGGTCATCGGCTGTAAACGAGC                  |
|                            | T-HR-downarm-F         | ATGGTACAGGGCAAAGATTGAAAAATAAC           |
|                            | T-HR-downarm-R         | CAATCTGGTTATGTCTAACGTCTGAAAAATATATTA    |
| Donor 4                    | T-end-uparm-F          | GTTAGACATAACCAGATTGGCAGCACT             |
|                            | T-end-uparm-R          | GCGACGCACCCCGAATTC <sup>T</sup> AC      |
|                            | T-end-downarm-F        | GCTGTACGCCCGCGGCTTG                     |
|                            | T-end-downarm-R        | TACCAAGTCTTTTAAACAATCCACGCACCTA         |
| L-I-SceI                   | plits-A036-I-SceI-R2   | TGTTATCCCTATGGCGTAATCATGGTCATAGCTGTTTCC |
|                            | plits-upT7-I-SceI-F2   | GGTAATAGCTACGTAATACGACTCACTATAGG        |
| R-I-SceI                   | plits-downT7-I-SceI-R2 | TGTTATCCCTACGTAATACGACTCACTATAGG        |
|                            | plits-A001-I-SceI-F2   | GGTAATGACTGGCCGTCGTTTTACAACGTCGT        |
| LR-I-SceI                  | plits-A036-I-SceI-R2   | TGTTATCCCTATGGCGTAATCATGGTCATAGCTGTTTCC |
|                            | plits-upT7-I-SceI-F2   | GGTAATAGCTACGTAATACGACTCACTATAGG        |
|                            | plits-downT7-I-SceI-R2 | TGTTATCCCTACGTAATACGACTCACTATAGG        |
|                            | plits-A001-I-SceI-F2   | GGTAATGACTGGCCGTCGTTTTACAACGTCGT        |
| Vector donor<br>500 bp arm | T4-Donor500bp-F        | TCTTATATTAATCCTGTTAATTTTTGTTTCGGCTTAC   |
|                            | T4-Donor500bp-R        | ACACATTTATATTGACCAACAACAGGCAT           |
| Vector donor<br>250 bp arm | T4-Donor250bp-F        | TACAAGCCGAAACGCATTACTGCTT               |
|                            | T4-Donor250bp-R        | TTCAGTGCTCACCATCGTAATGTCC               |
| Vector donor<br>100 bp arm | T4-Donor100bp-F        | CATTGATGGCCGAGTATCGCGC                  |
|                            | T4-Donor100bp-R        | TGGTAAAGAATGGCGTGGACGAT                 |
| Vector donor<br>25 bp arm  | T4-Donor25bp-F         | TGCAGTAGAATTCGGGGTGCCTCGC               |
|                            | T4-Donor25bp-R         | GGCGTCAACGCCGGGGCGGTACAGC               |
| For all donors             | EGFP-full-F            | ATGGTGAGCAAGGGCGAGGA                    |
|                            | EGFP-full-R-outstop    | CTTGTACAGCTCGTCCATGCCG                  |
|                            | pZERO2-EcorV-R         | ATCTGCAGAATTCAGCACACTGG                 |
|                            | pZERO2-EcorV-F         | ATCCATCACACTGGCGGCC                     |

The red marked T in the primer "T-end-uparm-R" was designed to avoid gRNA attaching after genome editing.

Supplementary Table S4: Primers used for dsRNA synthesis and RT-PCR

| Gene            | Primer name       | Sequence (5' to 3')            |
|-----------------|-------------------|--------------------------------|
| <i>BmKU70</i>   | Ku70-N4dsRNA1-F   | TAGCGACCGCTCAGCTTATT           |
|                 | Ku70-N4dsRNA1-R   | GCTGGACCAAATGGGTATTT           |
| <i>BmKU80</i>   | Ku80-N4dsRNA1-F   | TTTATGATATGGCGCGTGAA           |
|                 | Ku80-N4dsRNA1-R   | AGCCTTGAAACCATTTCAGGA          |
| <i>BmLIG IV</i> | Lig IV-N4dsRNA1-F | ACTCATCTGCCTCCTGCACT           |
|                 | Lig IV-N4dsRNA1-F | ATGGTAGCATTTCCTCGGG            |
| <i>BmXRCC4</i>  | XRCC4-N4dsRNA1-F  | TGGAGATGGAATCCTGAAGAA          |
|                 | XRCC4-N4dsRNA1-R  | GGTTGTGGGTACATCATCCC           |
| <i>BmXLF</i>    | XLF-N4dsRNA1-F    | AACCTACTGAAGATAATCAATGATCTGT   |
|                 | XLF-N4dsRNA1-R    | GATCGACTTTTGTAGTTTCGCGT        |
| <i>BmGAPDH</i>  | GAPDH-RT5         | GGCCGCATTGGCCGTTTGGTGCTCCG     |
|                 | GAPDH-RT3         | GTGGGGCAAGACAGTTTGTGGTGCAAGAAG |

Supplementary Table S5: Primers used for Genomic DNA PCR

| Purpose                    | Primer name          | Sequence (5' to 3')                  | Length  |
|----------------------------|----------------------|--------------------------------------|---------|
| Ku70 gRNA targeting site   | Ku70-site-F          | GAAGTAGAAGAGTGCGAAGAGTTTTTC          | 861 bp  |
|                            | Ku70-site-R          | GTGAAGCAGCTCAGACTTAAGTAAAGGC         |         |
| Ku80 gRNA targeting site   | Ku80-site-F          | GTTGCTGAGCCTTTTGGATCGGC              | 845 bp  |
|                            | Ku80-site-R          | GGATTCAGACTTCGAAATGCAATACAGTCT       |         |
| Lig IV gRNA targeting site | Lig IV-site-F        | TCCCTTGGTTCATTGCTGGTG                | 970 bp  |
|                            | Lig IV-site-R        | ACTAACAATCAGCCACGTTAACTG             |         |
| XLF gRNA targeting site    | XLF-site-F           | CAATGTCATAAAATTAGTGTGAACGTGAACTG     | 752 bp  |
|                            | XLF-site-R           | TTAAAATGTAGACTTCCAGAGTATCAGATGAAATG  |         |
| XRCC4 gRNA targeting site  | XRCC4-site-F         | CTTTGGAGATGGAATCCTGAAGAAC            | 569 bp  |
|                            | XRCC4-site-R         | GGGAGATCAAAATGTTTATAATTCAGAAAG       |         |
| D1 5' junction             | D1-5-F               | CCAAAGATGAAAAATGTTACTGAAGCCTTG       | 1574 bp |
|                            | EGFP-R               | GTTGTACTCCAGCTTGTGCCCCAGGATG         |         |
| D2 5' junction             | D2-5-F               | ATGTACGAGGCACGTGAATTTCTTAG           | 1555 bp |
|                            | EGFP-R               | GTTGTACTCCAGCTTGTGCCCCAGGATG         |         |
| D3 5' junction             | D1-5-F               | CCAAAGATGAAAAATGTTACTGAAGCCTTG       | 1574 bp |
|                            | EGFP-R               | GTTGTACTCCAGCTTGTGCCCCAGGATG         |         |
| D4 5' junction             | D4-5-F               | CGCTGCGAACTATACCACTACCTTT            | 1336 bp |
|                            | EGFP-R               | GTTGTACTCCAGCTTGTGCCCCAGGATG         |         |
| D1 3' junction             | EGFP-F               | TACCCCGACCACATGAAGCAGCAGCAGC         | 1678 bp |
|                            | D1-3-R               | ATGTGTTTTAACAACGAGCGCGTCT            |         |
| D2 3' junction             | EGFP-F               | TACCCCGACCACATGAAGCAGCAGCAGC         | 1574 bp |
|                            | D2-3-R               | CCTCTTGCCAACGACATCATTATAGAA          |         |
| D3 3' junction             | EGFP-F               | TACCCCGACCACATGAAGCAGCAGCAGC         | 1574 bp |
|                            | D2-3-R               | CCTCTTGCCAACGACATCATTATAGAA          |         |
| D4 3' junction             | EGFP-F               | TACCCCGACCACATGAAGCAGCAGCAGC         | 1557 bp |
|                            | D4-3-R               | TGTATTTATAATCTGCGAATACAACAAAAAATTTGT |         |
| Loading control            | Reference-F (D2-5-F) | ATGTACGAGGCACGTGAATTTCTTAG           | 2211 bp |
|                            | Reference-R (D2-3-R) | CCTCTTGCCAACGACATCATTATAGAA          |         |
